# Supplementary material for: Exploring static and dynamic relationships between burden of disease and research funding in the United States
Source: PubMed Central journal article supplement (PMC9164716; doi:10.1186/s12961-022-00837-y), 2022-06-03
Supplement: 12961_2022_837_MOESM1_ESM.pdf [file 12961_2022_837_MOESM1_ESM.pdf]

Additional File 1:Table S1. GBD and NIH Merged Disease Categories

| GBD Categories                                | NIH Research Disease Categories 2006-2007                    | NIH Research Disease Categories 2008-2014                     | NIH Research Disease Categories 2014-2017                                                                                |
|-----------------------------------------------|--------------------------------------------------------------|---------------------------------------------------------------|--------------------------------------------------------------------------------------------------------------------------|
| Age-Related Macular Degeneration              | Macular Degeneration                                         | Macular Degeneration                                          | Macular Degeneration                                                                                                     |
| Alcohol use disorders                         | Alcoholism                                                   | Alcoholism, Alcohol Use and Health 1/                         | Alcoholism, Alcohol Use and Health 1/                                                                                    |
| Alzheimer's disease and other dementias       | Alzheimer's Disease                                          | Alzheimer's Disease                                           | Alzheimer's Disease (2014); Alzheimer's Disease including Alzheimer's Disease Related Dementias (AD/ADRD) 2/ (2015-2017) |
| Arthritis_NEW                                 | Arthritis                                                    | Arthritis                                                     | Arthritis                                                                                                                |
| Asthma                                        | Asthma                                                       | Asthma                                                        | Asthma                                                                                                                   |
| Attention-deficit/hyperactivity disorder      | Attention Deficit Disorder (ADD)                             | Attention Deficit Disorder (ADD)                              | Attention Deficit Disorder (ADD)                                                                                         |
| Autism spectrum disorders                     | Autism                                                       | Autism                                                        | Autism                                                                                                                   |
| Brain and nervous system cancer               | Brain Cancer                                                 | Brain Cancer                                                  | Brain Cancer                                                                                                             |
| Breast cancer                                 | Breast Cancer                                                | Breast Cancer                                                 | Breast Cancer                                                                                                            |
| Cervical cancer                               | Cervical Cancer                                              | Cervical Cancer                                               | Cervical Cancer                                                                                                          |
| Chronic obstructive pulmonary disease         | Chronic Obstructive Pulmonary Disease                        | Chronic Obstructive Pulmonary Disease                         | Chronic Obstructive Pulmonary Disease                                                                                    |
| Cirrhosis and other chronic liver diseases    | Chronic Liver Disease and Cirrhosis                          | Chronic Liver Disease and Cirrhosis                           | Chronic Liver Disease and Cirrhosis                                                                                      |
| Colon and rectum cancer                       | Colo-Rectal Cancer                                           | Colo-Rectal Cancer                                            | Colo-Rectal Cancer                                                                                                       |
| Depressive disorders                          | Depression                                                   | Depression                                                    | Depression                                                                                                               |
| Diabetes mellitus                             | Diabetes                                                     | Diabetes 4/                                                   | Diabetes 4/                                                                                                              |
| Drug use disorders                            | Drug Abuse (NIDA only)                                       | Drug Abuse (NIDA Only) 5/                                     | Drug Abuse (NIDA Only) 5/                                                                                                |
| Epilepsy                                      | Epilepsy                                                     | Epilepsy                                                      | Epilepsy                                                                                                                 |
| HIV/AIDS                                      | HIV/AIDS 114                                                 | HIV/AIDS 9/                                                   | HIV/AIDS 9/                                                                                                              |
| Hypertensive heart disease                    | Hypertension                                                 | Hypertension                                                  | Hypertension                                                                                                             |
| Hodgkin Lymphoma                              | Hodgkin's Disease                                            | Hodgkin's Disease                                             | Hodgkin's Disease                                                                                                        |
| Inflammatory Bowel Disease                    | Inflammatory Bowel Disease                                   | Inflammatory Bowel Disease                                    | Inflammatory Bowel Disease                                                                                               |
| Injuries                                      | Injury (total) Accidents/Adverse Effects                     | Injury (total) Accidents/Adverse Effects                      | Injury (total) Accidents/Adverse Effects                                                                                 |
| Ischemic heart disease                        | Heart Disease: Coronary Heart Disease                        | Heart Disease - Coronary Heart Disease                        | Heart Disease - Coronary Heart Disease                                                                                   |
| Liver cancer                                  | Liver Cancer                                                 | Liver Cancer                                                  | Liver Cancer                                                                                                             |
| Multiple sclerosis                            | Multiple Sclerosis                                           | Multiple Sclerosis                                            | Multiple Sclerosis                                                                                                       |
| Neonatal disorders                            | Perinatal Period, Conditions Originating in Perinatal Period | Perinatal Period - Conditions Originating in Perinatal Period | Perinatal Period - Conditions Originating in Perinatal Period                                                            |
| Oral disorders                                | Dental/Oral and Craniofacial Disease                         | Dental/Oral and Craniofacial Disease                          | Dental/Oral and Craniofacial Disease                                                                                     |
| Ovarian cancer                                | Ovarian Cancer                                               | Ovarian Cancer                                                | Ovarian Cancer                                                                                                           |
| Parkinson's disease                           | Parkinson's Disease                                          | Parkinson's Disease                                           | Parkinson's Disease                                                                                                      |
| Polycystic Ovarian Syndrome                   | Polycystic Kidney Disease                                    | Polycystic Kidney Disease                                     | Polycystic Kidney Disease                                                                                                |
| Prostate cancer                               | Prostate Cancer                                              | Prostate Cancer                                               | Prostate Cancer                                                                                                          |
| Schizophrenia                                 | Schizophrenia                                                | Schizophrenia                                                 | Schizophrenia                                                                                                            |
| Self-harm                                     | Suicide                                                      | Suicide                                                       | Suicide                                                                                                                  |
| Sexually transmitted infections excluding HIV | Sexually Transmitted Diseases/Herpes                         | Sexually Transmitted Diseases/Herpes                          | Sexually Transmitted Diseases/Herpes                                                                                     |
| Stroke_NEW                                    | Stroke                                                       | Stroke                                                        | Stroke                                                                                                                   |
| Tracheal, bronchus, and lung cancer           | Lung Cancer                                                  | Lung Cancer                                                   | Lung Cancer                                                                                                              |
| Tuberculosis                                  | Tuberculosis                                                 | Tuberculosis                                                  | Tuberculosis                                                                                                             |
| Uterine cancer                                | Uterine Cancer                                               | Uterine Cancer                                                | Uterine Cancer                                                                                                           |

## Individual Disease Categories Collapsed to match GBD or NIH

**Arthritis.** ‘Osteoarthritis’ and ‘Rheumatoid arthritis’ (GBD) were summed to match “Arthritis” (RCDC)

**Stroke.** ‘Stroke’ and ‘Ischemic Stroke’ and ‘intracerebral hemorrhage’ and ‘subarachnoid hemorrhage’ (GBD) were summed to match ‘Stroke’ (RCDC)

**Alzheimer's Disease and Related Dementias (RCDC).** 'Alzheimer's Disease' (RCDC 2006-20014) and 'Alzheimer's Disease including Alzheimer's Disease Related Dementias (AD/ADRD) 2/' (RCDC 2015-2017) were used to match 'Alzheimer's disease and other Dementias' (GBD)
